# Supplementary material
Source: PubMed Central journal article supplement (PMC6821595)
Supplement: NIHMS1528238-supplement-1.pdf [file NIHMS1528238-supplement-1.pdf]

1

2 **Supplemental Table 1. Baseline recipient demographic characteristics after**3 **propensity matching**

| Variable                                                                           | Time from brain death to cross clamp |                         | p-value |
|------------------------------------------------------------------------------------|--------------------------------------|-------------------------|---------|
|                                                                                    | < 22 hours<br>(n=2,112)              | > 42 hours<br>(n=2,112) |         |
| Male gender                                                                        | 78.6% (1,660)                        | 76.9% (1,625)           | 0.208   |
| Age (median, IQR)                                                                  | 55 (16)                              | 56 (12)                 | 0.697   |
| Ethnicity                                                                          |                                      |                         | 0.006   |
| White                                                                              | 70.4% (1,487)                        | 69.6% (1,471)           |         |
| Black                                                                              | 19.4% (410)                          | 17.1% (362)             |         |
| Hispanic                                                                           | 6.9% (145)                           | 9.5% (200)              |         |
| Other                                                                              | 3.3% (70)                            | 3.7% (79)               |         |
| Recipient history of diabetes                                                      | 30.3% (639)                          | 28.2% (596)             | 0.155   |
| Recipient heart failure etiology                                                   |                                      |                         | 0.488   |
| Ischemic                                                                           | 37.4% (790)                          | 35.7% (755)             |         |
| Non-ischemic dilated                                                               | 47.1% (995)                          | 48.8% (1,031)           |         |
| Other                                                                              | 15.5% (327)                          | 15.4% (326)             |         |
| Pre-transplant status                                                              |                                      |                         | 0.661   |
| Intensive care unit                                                                | 30.3% (639)                          | 30.0% (633)             |         |
| Hospitalized (non-ICU)                                                             | 16.8% (354)                          | 15.9% (335)             |         |
| Not hospitalized                                                                   | 53.0% (1,119)                        | 54.2% (1,144)           |         |
| Medical therapy                                                                    |                                      |                         |         |
| IV antibiotics in two weeks before transplant                                      | 9.8% (208)                           | 9.3% (197)              | 0.601   |
| IV inotropes prior to transplant                                                   | 45.9% (970)                          | 41.7% (880)             | 0.006   |
| VAD prior to transplant                                                            | 34.7% (732)                          | 37.3% (787)             | 0.083   |
| Year of transplant (median, IQR)                                                   | 2009 (5)                             | 2010 (4)                | < 0.001 |
| IQR, interquartile range; ICU, intensive care unit; VAD, ventricular assist device |                                      |                         |         |

4

5

6

7

8

9

1

2 **Supplemental Table 2. Cox Proportional Hazards regression analysis for recipient**3 **mortality among propensity matched cohort**

| Predictor                                     | Hazard Ratio | 95% Confidence Interval |       | p-value |
|-----------------------------------------------|--------------|-------------------------|-------|---------|
|                                               |              | Lower                   | Upper |         |
| <b>Donor/graft characteristics</b>            |              |                         |       |         |
| Age (per year)                                | 1.01         | 1.01                    | 1.02  | < 0.001 |
| <b>Ethnicity</b>                              |              |                         |       |         |
| White                                         | Ref          | Ref                     | Ref   | Ref     |
| Black                                         | 1.24         | 1.06                    | 1.46  | 0.009   |
| Hispanic                                      | 1.09         | 0.93                    | 1.29  | 0.282   |
| Other                                         | 1.43         | 0.91                    | 2.27  | 0.123   |
| Ischemic time (per hour)                      | 1.06         | 1.00                    | 1.12  | 0.055   |
| <b>Brain death time</b>                       |              |                         |       |         |
| > 42 hours                                    | Ref          | Ref                     | Ref   | Ref     |
| < 22 hours                                    | 1.06         | 0.93                    | 1.19  | 0.386   |
| <b>Recipient characteristics</b>              |              |                         |       |         |
| Age (per year)                                | 1.00         | 1.00                    | 1.01  | 0.504   |
| Male gender (vs female)                       | 0.91         | 0.79                    | 1.05  | 0.210   |
| <b>Ethnicity</b>                              |              |                         |       |         |
| White                                         | Ref          | Ref                     | Ref   | Ref     |
| Black                                         | 1.33         | 1.15                    | 1.55  | < 0.001 |
| Hispanic                                      | 0.97         | 0.78                    | 1.22  | 0.820   |
| Other                                         | 1.12         | 0.82                    | 1.52  | 0.474   |
| Diabetes                                      | 1.26         | 1.11                    | 1.42  | < 0.001 |
| VAD at transplant                             | 1.12         | 0.98                    | 1.29  | 0.105   |
| IV inotropes at transplant                    | 1.02         | 0.89                    | 1.17  | 0.743   |
| <b>Heart failure etiology</b>                 |              |                         |       |         |
| Ischemic                                      | Ref          | Ref                     | Ref   | Ref     |
| Non-ischemic dilated                          | 0.80         | 0.69                    | 0.91  | 0.001   |
| Other                                         | 1.07         | 0.90                    | 1.27  | 0.469   |
| IV antibiotics in two weeks before transplant | 1.39         | 1.16                    | 1.66  | < 0.001 |
| <b>Pre-transplant recipient status</b>        |              |                         |       |         |
| Intensive care unit                           | Ref          | Ref                     | Ref   | Ref     |
| Hospitalized (non-ICU)                        | 0.92         | 0.78                    | 1.10  | 0.360   |
| Not hospitalized                              | 0.82         | 0.70                    | 0.94  | 0.005   |

|                                                          |      |      |      |       |
|----------------------------------------------------------|------|------|------|-------|
| Year of transplant (per year)                            | 1.00 | 0.97 | 1.02 | 0.811 |
| VAD, ventricular assist device; ICU, intensive care unit |      |      |      |       |

1
